# Supplementary material for: Affordability of Paediatric Oral Anti-Infective Medicines in a Selected District, Sri Lanka
Source: MDPI journal article supplement (doi:10.3390/pharma3010011), 2024-03-12
Supplement: s1 [file s1]

1 **Supplementary file S3**

2 **Table S1.** Dosage and Duration of Treatment for Selected Oral Paediatric Anti-infective Medicines for  
3 Affordability Analysis

| Medicine                                                                                      | Dosage         | Duration         |
|-----------------------------------------------------------------------------------------------|----------------|------------------|
| Amoxicillin powder for oral liquid: 125 mg (as trihydrate)/5 ml                               | 5ml 8 hourly   | 7 days           |
| Amoxicillin + Clavulanic acid oral liquid: 125 mg Amoxicillin + 31.25 mg Clavulanic acid/5 ml | 5ml 8 hourly   | 7 days           |
| Cefalexin powder for reconstitution with water: 125 mg/5 ml                                   | 5ml 8 hourly   | 7 days           |
| Cloxacillin powder for oral liquid: 125 mg (as sodium salt)/5 ml                              | 5ml 6 hourly   | 7 days           |
| Erythromycin powder for oral liquid: 125 mg/5 ml (as stearate or estolate or ethyl succinate) | 5ml 6 hourly   | 7 days           |
| Metronidazole oral liquid: 200 mg (as benzoate)/5 ml.                                         | 2.5ml 8 hourly | 7 days           |
| Fluconazole oral liquid: 50 mg/5 ml                                                           | 5ml daily      | 7 days           |
| Nitrofurantoin 25 mg/ 5 ml                                                                    | 2.5ml 6 hourly | 7 days           |
| Acyclovir tablet: 200 mg tablet                                                               | 400mg 6 hourly | 5 days           |
| Pyrantel oral liquid: 50 mg (as embonate or pamoate)/ml                                       | 2.5ml daily    | 3 days           |
| Albendazole tablet (chewable): 200 mg                                                         | 2 tablets      | As a single dose |

4

5
