# Supplementary material for: Affordability of Paediatric Oral Anti-Infective Medicines in a Selected District, Sri Lanka
Source: MDPI journal article supplement (doi:10.3390/pharma3010011), 2024-03-12
Supplement: s1 [file s1]

1 **Supplementary File S2**

2 **Paediatric Oral anti-infective Medicine Prices- Data Collection Form**

- 3 1. Albendazole tablet (chewable): 200 mg
- 4 2. Pyrantel oral liquid: 50 mg (as embonate or pamoate)/ml
- 5 3. Amoxicillin powder for oral liquid: 125 mg (as trihydrate)/5 ml
- 6 4. Amoxicillin + Clavulanic acid oral liquid: 125 mg Amoxicillin + 31.25 mg Clavulanic acid/5 ml
- 7 5. Cefalexin powder for reconstitution with water: 125 mg/5 ml
- 8 6. Cloxacillin powder for oral liquid: 125 mg (as sodium salt)/5 ml
- 9 7. Erythromycin powder for oral liquid: 125 mg/5 ml (as stearate or estolate or ethylsuccinate)
- 10 8. Metronidazole oral liquid: 200 mg (as benzoate)/5 ml.
- 11 9. Fluconazole oral liquid: 50 mg/5 ml
- 12 10. Nitrofurantoin 25 mg/ 5 ml
- 13 11. Acyclovir tablet: 200 mg tablet

14

| A                                       | B             | C                        | D            | E                                | F                     | G               | H                   | I          | J        |
|-----------------------------------------|---------------|--------------------------|--------------|----------------------------------|-----------------------|-----------------|---------------------|------------|----------|
| Generic Name<br>Dosage form<br>Strength | Medicine Type | Brand or Product Name(s) | Manufacturer | Availability<br>"Yes" or<br>"No" | Pack size recommended | Pack size found | Price of Pack found | Unit price | Comments |
| Amoxicillin Syrup<br>125mg/5ml          |               |                          |              |                                  |                       |                 |                     |            |          |
|                                         |               |                          |              |                                  |                       |                 |                     |            |          |
|                                         |               |                          |              |                                  |                       |                 |                     |            |          |
|                                         |               |                          |              |                                  |                       |                 |                     |            |          |
|                                         |               |                          |              |                                  |                       |                 |                     |            |          |
|                                         |               |                          |              |                                  |                       |                 |                     |            |          |

15
